# Supplementary material for: HPV vaccination and sexual behaviour in healthcare seeking young women in Luxembourg
Source: PeerJ journal article supplement (doi:10.7717/peerj.8516), 2020-02-10
Supplement: Questionnaire.pdf [file Questionnaire.pdf]

# Questionnaire

## 1. Have you been vaccinated against human papillomavirus (HPV) ?

yes  no  don't know

If yes : date of 1st dose : \_\_\_/ \_\_\_/ 20\_\_\_ number of doses : \_\_\_\_\_

Vaccine : Gardasil  Cervarix  don't know

## 2. Have you had sexual relations?

Yes  No

If yes :

a) How old were you at 1st sexual relationship: \_\_\_\_\_

b) How many partners have you had in total? (Please indicate all sexual partners, short or long duration).

Number of sexual partners: \_\_\_\_\_

c) Please indicate age and sex of your last sexual partner, as well as the calendar year when sexual relationship started:

Last partner age: \_\_\_ ; sex: M / F

Year of 1st sexual contact with partner: \_\_\_\_\_

## 3. Do you smoke cigarettes ?

Daily  often  sometimes  never

## 4. Do you use condoms ?

Always  often  sometimes  never
